# Supplementary material for: Fluorescence properties of polyaryletherketone rare earth-coordinated complexes in near-infrared region
Source: Royal Society of Chemistry journal article supplement (doi:10.1039/c2ra21336b), 2012-01-01
Supplement: c2ra21336b.pdf [file c2ra21336b.pdf]

## Supporting Information

Fluorescence properties of polyaryletherketone rare earth-coordinated complexes in near-infrared region

Dan Liu<sup>a,b</sup>, and Zhonggang Wang<sup>a\*</sup>

*a* State Key Laboratory of Fine Chemicals, Department of Polymer Science and Materials, School of Chemical Engineering, Dalian University of Technology, Dalian 116024, China

*b* School of Biochemistry and Chemical Engineering, Jiaying University, Jiaying, China

Email: zgwang@dlut.edu.cn

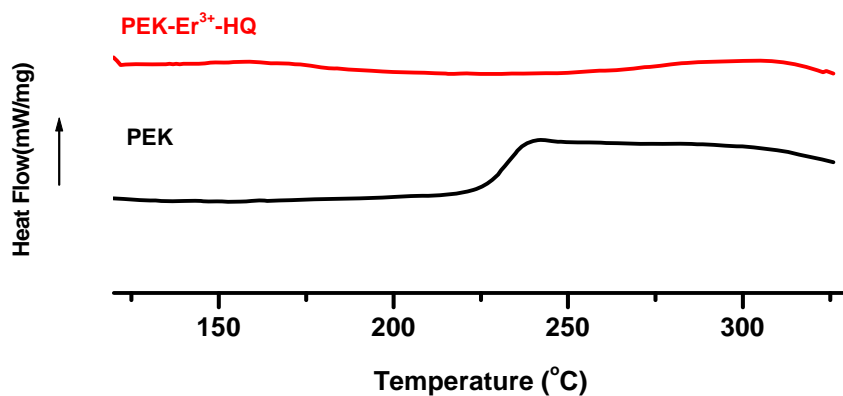

**Fig. 1S** DSC curves of PEK-1 and PEK-3-Er<sup>3+</sup>-HQ
